# Supplementary material for: Enhancing performance of Ag–ZnO–Ag UV photodetector by piezo-phototronic effect
Source: Royal Society of Chemistry journal article supplement (doi:10.1039/c8ra01189c), 2018-01-01
Supplement: c8ra01189c1.pdf [file c8ra01189c1.pdf]

# Supporting Information

## Enhancing performance of Ag-ZnO-Ag UV photodetector by piezo-phototronics effect

Xiaotong Zhang<sup>1</sup>, Yu Qiu<sup>1,3,\*</sup>, Dechao Yang<sup>2</sup>, Bing Li<sup>1</sup>, Heqiu Zhang<sup>1,3</sup>, Lizhong  
Hu<sup>1,3,\*</sup>

<sup>1</sup>School of Physics and Optoelectronic Technology, Dalian University of Technology, Dalian 116024,  
People's Republic of China

<sup>2</sup>Department of Electronic Engineering, Dalian Neusoft University of Information, Dalian, 116024,  
People's Republic of China

<sup>3</sup>The Key Laboratory for Micro/Nano Technology and System of Liaoning Province, Dalian University  
of Technology, Dalian 116024, People's Republic of China

\*Corresponding Author. E-mail: yuqiu@dlut.edu.cn,

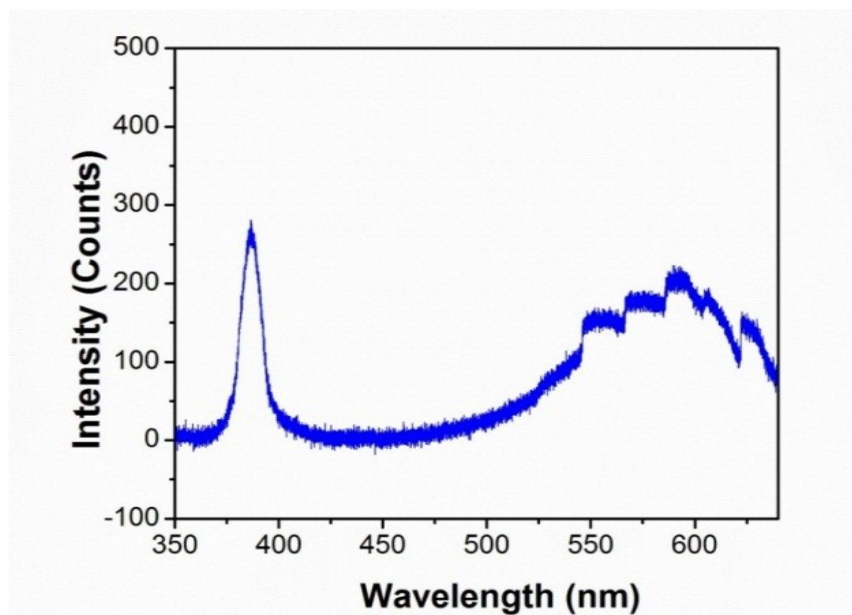

**Figure S1** Room-temperature photoluminescence spectrum of as-grown ZnO nanowires.

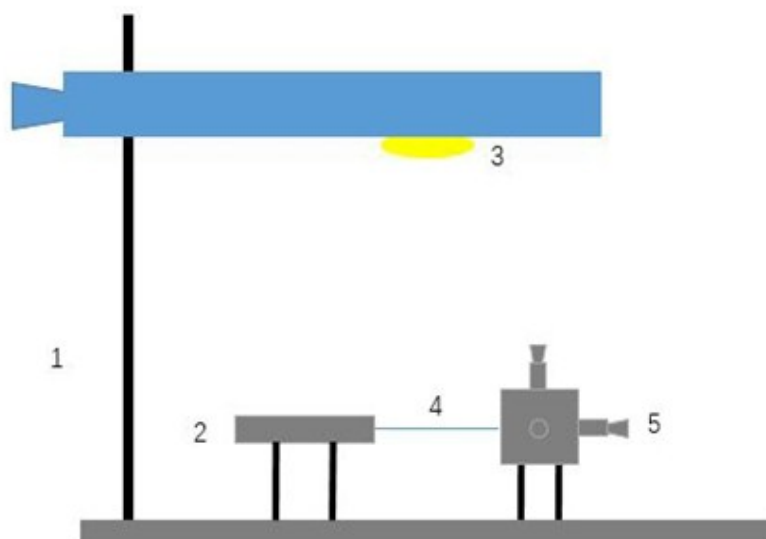

1. Adjustable bracket    2. Fixed sample platform  
3. Mono chromatic UV (centered at 365 nm)  
4. Flexible plastic board    5. 3D mechanical stage

**Figure S2** . Schematic diagram of the measuring setup.
